# Supplementary material for: Reduced recombination and enhanced UV-assisted photocatalysis by highly anisotropic titanates from electrospun TiO2–SiO2 nanostructures
Source: Royal Society of Chemistry journal article supplement (doi:10.1039/c4ra03498h), 2014-01-01
Supplement: c4ra03498h1.pdf [file c4ra03498h1.pdf]

Cite this: DOI: 10.1039/c0xx00000x

www.rsc.org/xxxxxx

## Supplementary Information

### Reduced recombination and enhanced UV-assisted photocatalysis by highly anisotropic titanates from electrospun TiO<sub>2</sub>-SiO<sub>2</sub> nanostructures

Veluru Jagadeesh Babu<sup>a,\*</sup>, Sesa Vempati<sup>a</sup>, and Seeram Ramakrishna<sup>b,c,\*</sup>

Received (in XXX, XXX) Xth XXXXXXXXXX 20XX, Accepted Xth XXXXXXXXXX 20XX

5 DOI: 10.1039/b000000x

<sup>a</sup>UNAM-National Nanotechnology Research Center, Bilkent University, Ankara-06800, Turkey.  
Tel: +90 312 290 3584. Fax: +90 312 266 4365; e-mail: [babu@unam.bilkent.edu.tr](mailto:babu@unam.bilkent.edu.tr).

10 <sup>b</sup>NUS Center for Nanofibers and Nanotechnology, NUS Nanoscience and nanotechnology Initiative (NUSNNI), National University of Singapore, Singapore-117576.

<sup>c</sup>Department of Mechanical Engineering, Faculty of Engineering, National University of Singapore, Singapore-117576.  
e-mail: [seeram@nus.edu.sg](mailto:seeram@nus.edu.sg);

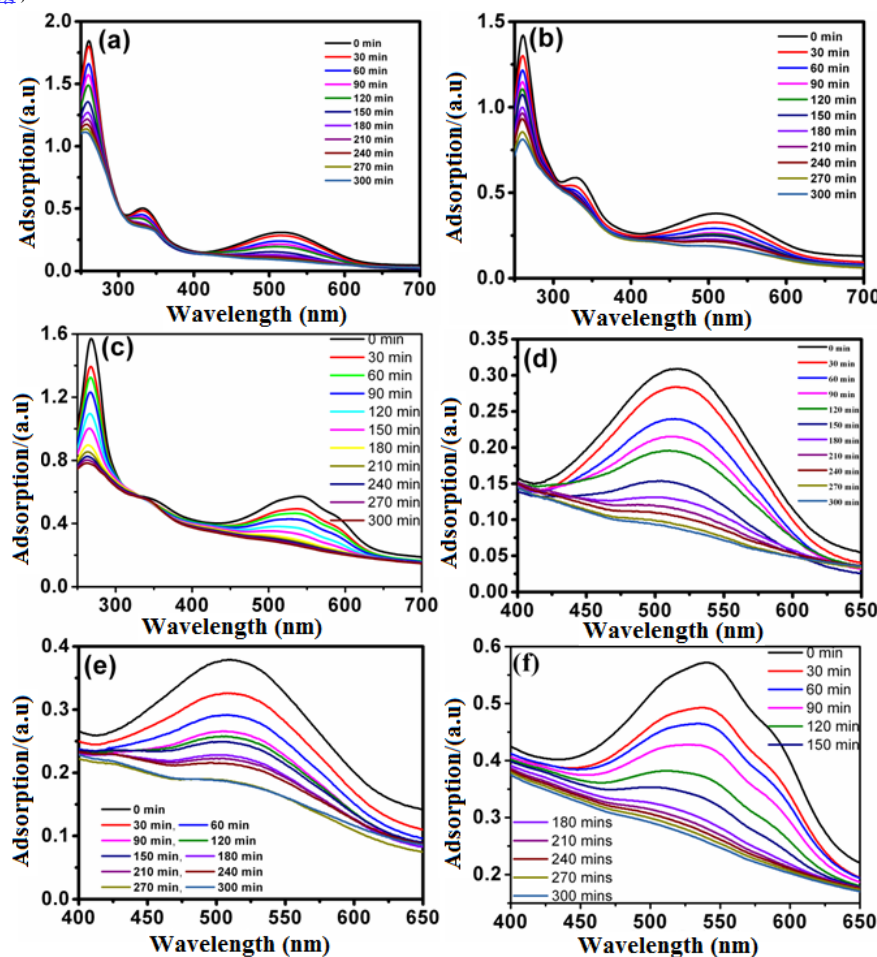

SI-1: Photocatalysis for (a) sponge (b) thorns (c) the sample calcined at 700 °C (d) The peak at 515 nm for sponge shape 15 and (e) The peak at 515 nm for thorn shape and (f) The peak observed at 530 nm.
